# Supplementary material for: Phylogenetic informativeness reconciles ray-finned fish molecular divergence times
Source: PubMed Central journal article supplement (PMC4236503; doi:10.1186/s12862-014-0169-0), 2014-08-08

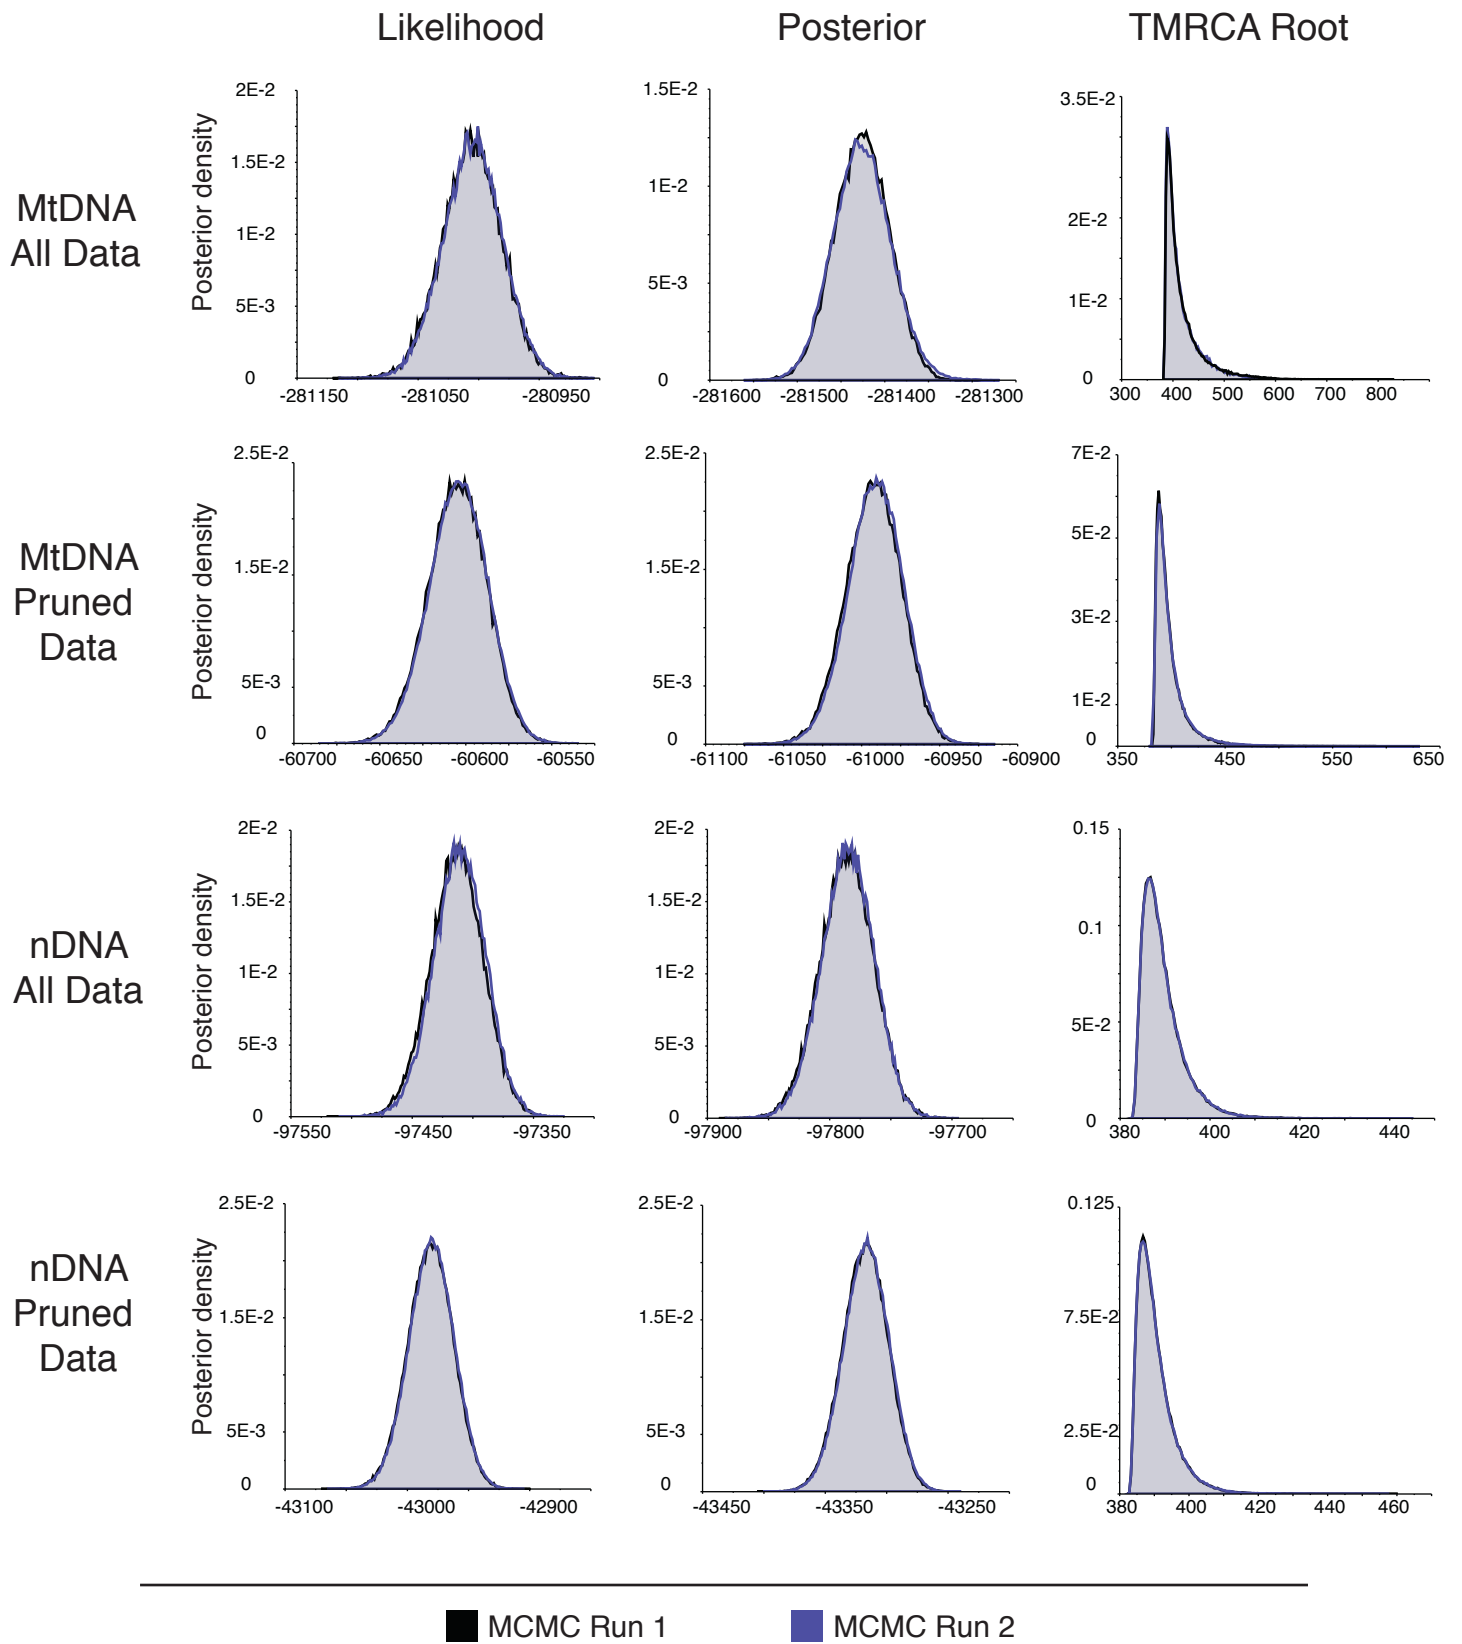

Supplement: s12862-014-0169-0-S4.pdf [file s12862-014-0169-0-S4.pdf]
